# Supplementary material
Source: PubMed Central journal article supplement (PMC6745906)
Supplement: hs9-2-e055-s001.pdf [file hs9-2-e055-s001.pdf]

**Supplemental Table 1.** Hematological indices of the proband heterozygous for PIEZO1 V598M (II:1) and an unaffected family member (I:1), from 2016. Some of these indices are more severe than usually encountered in HX patients with other causative PIEZO1 mutations (Andolfo et al., Am J Hematol 2018; 93:107-121). RR, reference range.

**Supplemental Figure 1.** Proband's pedigree. The sporadic heterozygous PIEZO1 mutation V598M present in proband is absent from other family members. The common variant  $\Delta$ K1878 previously proposed as pathogenic for HX does not cosegregate with symptomatic disease in this family, and was not reported in the French HX patient heterozygous for PIEZO1 V598M [5].

**Supplemental Figure 2. A.** Whole blood total RNA prepared from the proband and unaffected family members was reverse-transcribed to cDNA, PCR-amplified and Sanger-sequenced. The heterozygous PIEZO1 variant c.1792G>A encoding missense mutant 598V>M was detected in cDNA from the proband (II:1) only, a finding confirmed in genomic DNA (not shown). **B.** cDNA sequencing trace of the same stretch of PIEZO1 sequence from one unaffected family member (II:2) representative of that sequence in four additional unaffected family members (not shown). The sequence was confirmed in genomic DNA (not shown). **C.** Amino acid sequence alignment showing evolutionary conservation of human PIEZO1 residue V598 in PIEZO1 from mammals, birds, amphibia and fish, and in human PIEZO2.

**Supplemental Figure 3.** Peripheral blood smears (Wright Giemsa) of (A) proband (II:1) and her (B) Mother (I:2), from 2008.

**Supplemental Figure 4.** Ektacytometry scans from 2008 of red cells from proband (II.1, red), mother (I:1, purple), father (I:2, green) and a healthy control (blue), on a Lorca ektacytometer lacking capability of continuous osmotic gradient generation

(RR Mechatronics, Netherlands). **A.** Deformability at 400 mOsm and at discrete shear stress values. **B.** Deformability at 16.86 Pa and at discrete osmolarity values.

## Supplemental Table 1.

### Hematological indices of PIEZO1 V598M and WT erythrocytes.

| <b><i>Mature Erythrocytes</i></b>            | <b>WT</b> | <b>V598M</b> | <b>RR</b>    |
|----------------------------------------------|-----------|--------------|--------------|
| Red Blood Cells (X 10 <sup>6</sup> cells/uL) | 4.30      | 2.86         | 3.75-5.07    |
| Hematocrit (%)                               | 40.8      | 32.8         | 31.7-43.4    |
| Hemoglobin (g/dL)                            | 12.4      | 9.9          | 11.4-15.1    |
| Mean Cellular Volume (fL)                    | 94.9      | 114.8        | 82.7-90.2    |
| MCHC (g/dL)                                  | 30.4      | 30.1         | 33.6-35.3    |
| CHCM (g/dL)                                  | 29.3      | 29.5         | 32.2-37.7    |
| RDW (%)                                      | 13.3      | 18.1         | 12-15*       |
| HDW (g/dL)                                   | 1.96      | 3.44         | 1.9-3.0*     |
| % Hyperchromic cells                         | 0.0       | 0.1          | -            |
| <b><i>Reticulocytes</i></b>                  |           |              |              |
| Reticulocytes (X 10 <sup>6</sup> cells/uL)   | 0.038     | 0.424        | 0.0406-0.140 |
| Retics (%)                                   | 0.87      | 14.82        | 0.8-2        |
| Mean Cellular Volume (fL)                    | 102.8     | 118.7        | 93-121*      |
| CHCM (g/dL)                                  | 25.1      | 27.5         | 27-34*       |
| RDW (%)                                      | 9         | 11.7         | -            |
| HDW (g/dL)                                   | 2.33      | 3.28         | -            |
| % Hyperchromic reticulocytes                 | 0.0       | 0.2          | -            |

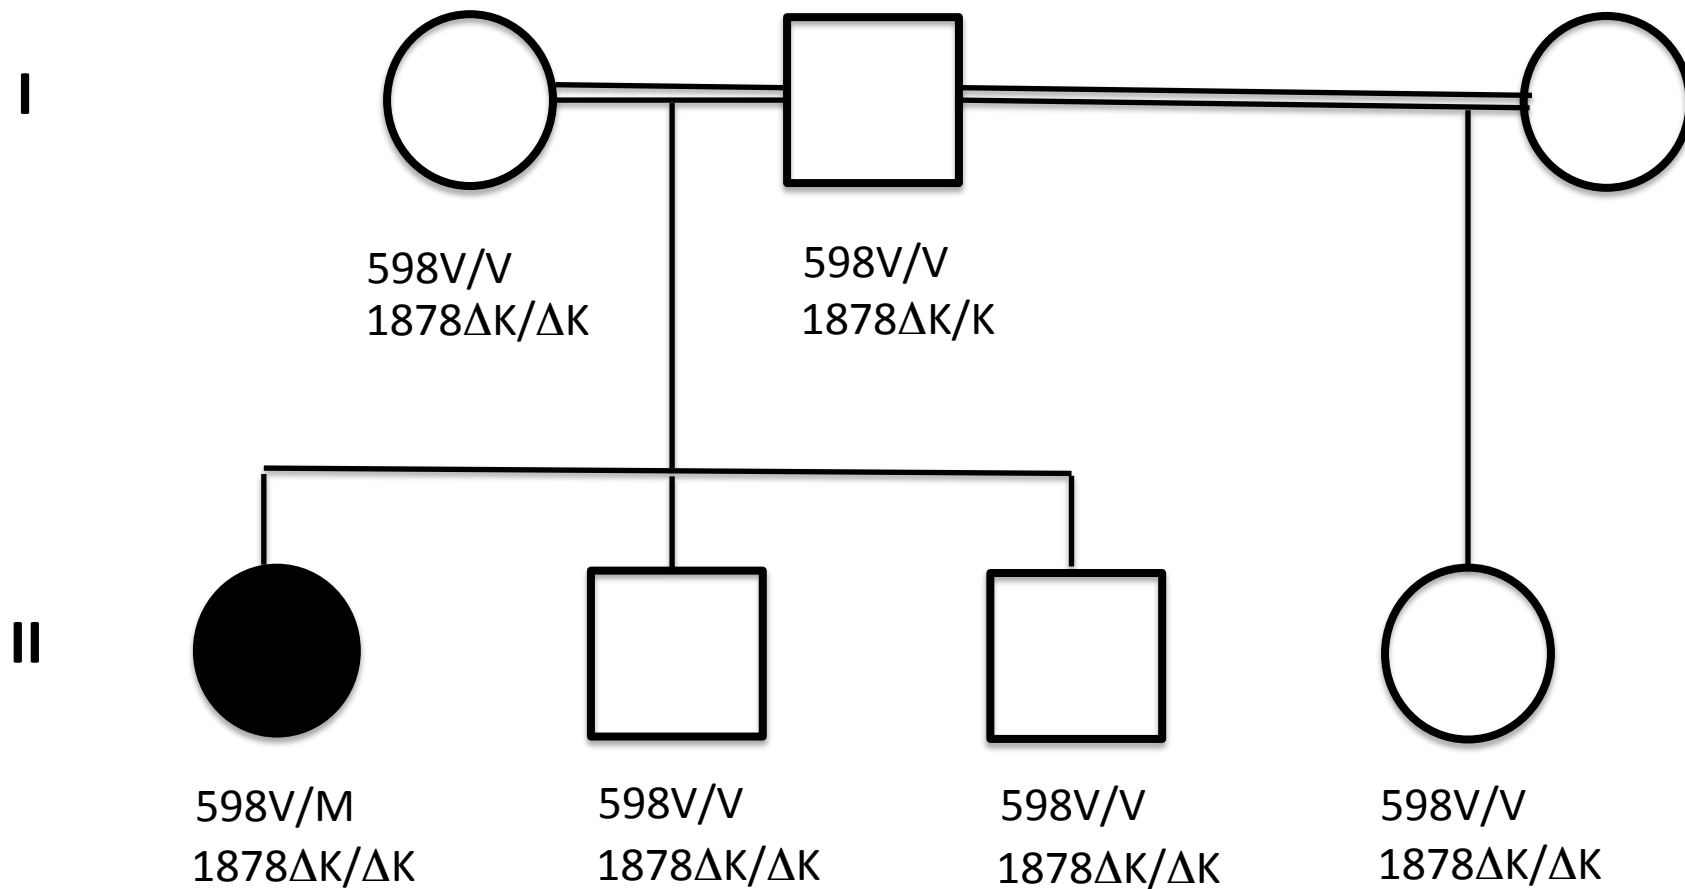

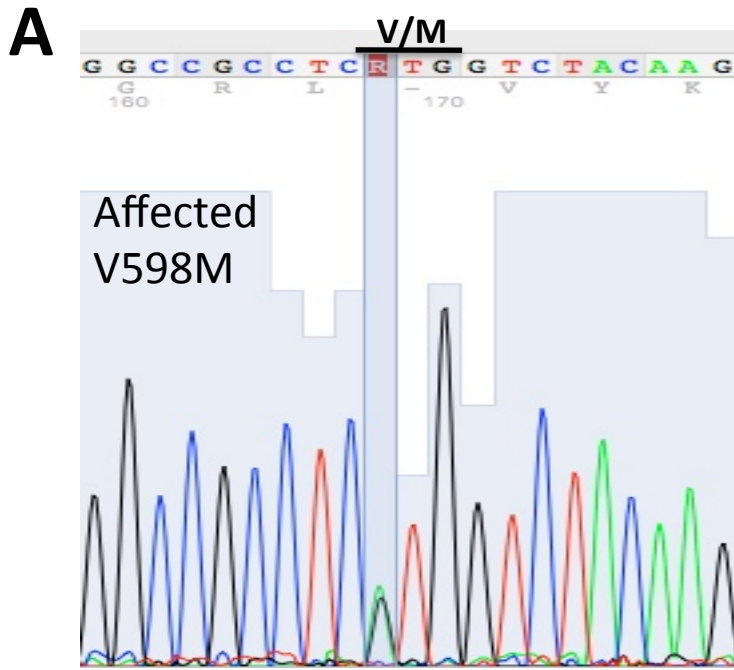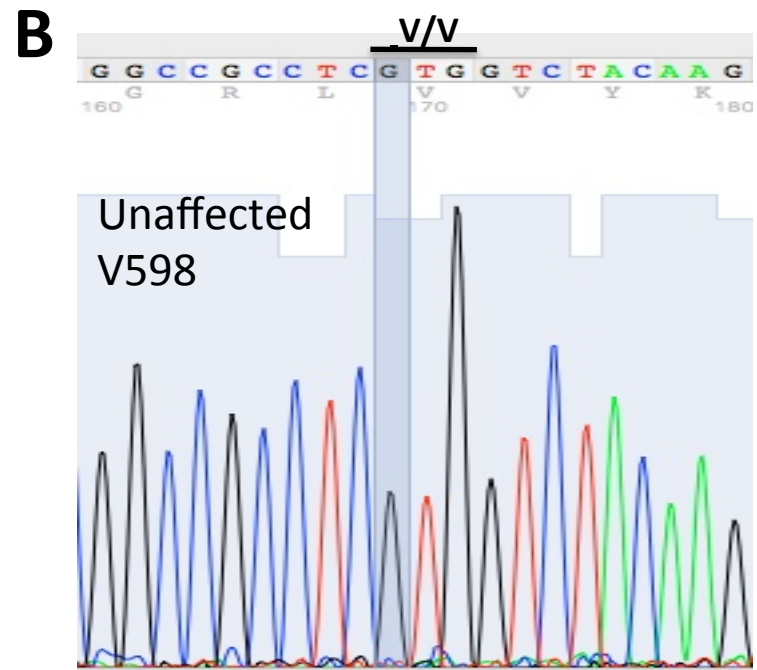

**C**

|                     |     |                      |                                             |     |
|---------------------|-----|----------------------|---------------------------------------------|-----|
| Human PIEZO2        | 685 | KYWIYVCGGMFFVVSFEGKI | <b>*</b><br><b>V</b> MYKIIYMVLF LFCVALYQVHY | 726 |
|                     |     | KYWIYVC GMF VSF G++  | <b>V</b> +YKI+YM LFL C+ L+QV+Y              |     |
| Human PIEZO1        | 578 | KYWIYVCAGMFIVVSFAGRL | <b>V</b> VYKIVYMFLFLLCLTLFQVYY              | 619 |
| <i>M. musculus</i>  | 583 | KYWIYVCAGMFIVVSFAGRL | <b>V</b> VYKIVYMFLFLLCLTLFQVYY              | 624 |
| <i>C. porcellus</i> | 586 | KYWIYVCAGMFIVVSFAGRL | <b>V</b> VYKIVYMFLFLLCLTLFQVYY              | 627 |
| <i>C. lupus</i>     | 590 | KYWIYVCAGMFIVVSFAGRL | <b>V</b> VYKIVYMLL FLLCLTLFQVYY             | 631 |
| <i>B. taurus</i>    | 383 | KYWIYVCAGMFIVVSFAGRL | <b>V</b> VYKIVYMLL FLLCLILFQVYY             | 424 |
| <i>G. gallus</i>    | 566 | KYWICVCAGMFIVVSFAGRL | <b>V</b> VYKIVYMFLFLLCLTLFQVYY              | 607 |
| <i>X. laevis</i>    | 584 | KYWIYVCGGMFIVVSFAGRL | <b>V</b> VYKIVYMLL FLLCLV SFQVYY            | 625 |
| <i>D. rerio</i>     | 597 | KYWIYVCGGMFIMVSFAGKL | <b>V</b> AYKIVYMLL FLLCMCLYQVYY             | 638 |
| <i>O. niloticus</i> | 602 | KYWIYVCGGMFIMVSFAGKL | <b>V</b> AYKIIYMLL FLLCMCLN QVYY            | 643 |

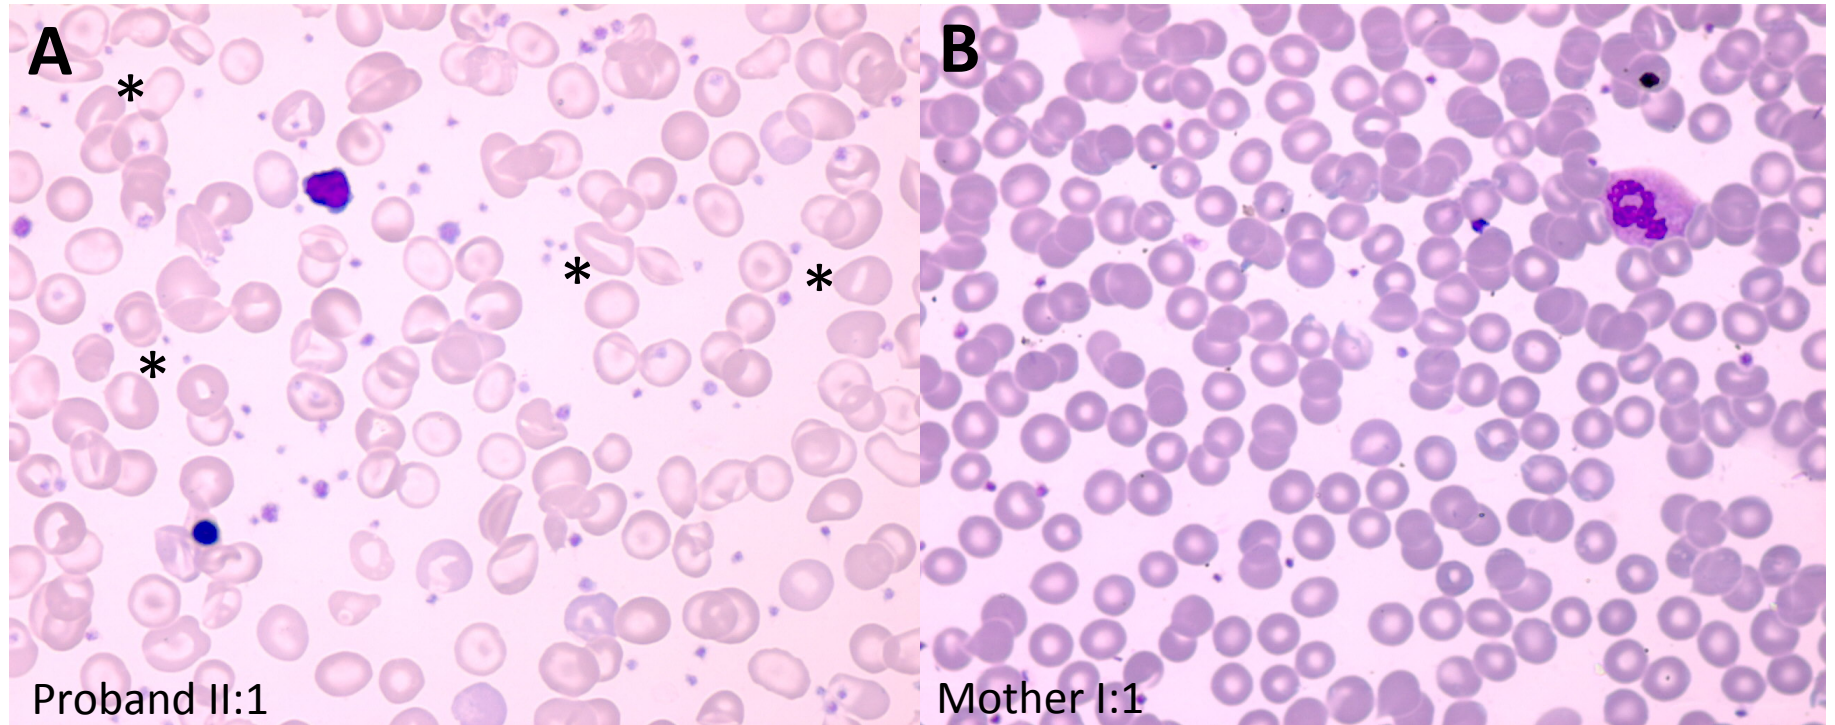

**A.** Deformability at 400 mOsm  
with varying shear stress

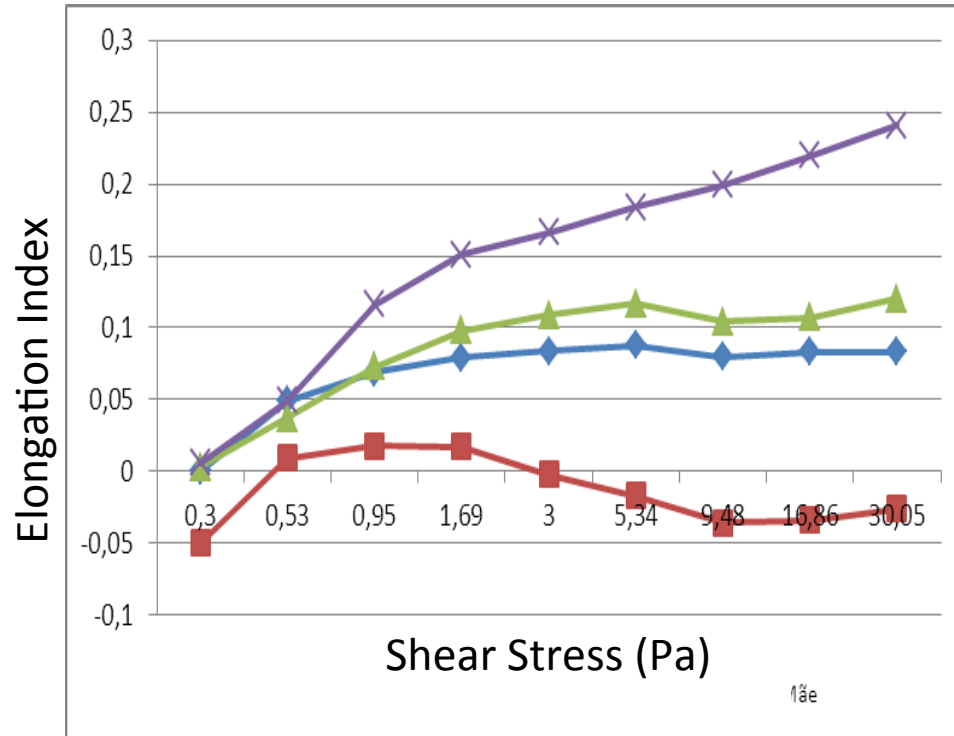

**B.** Deformability at 16.86 Pa  
with varying osmolarity

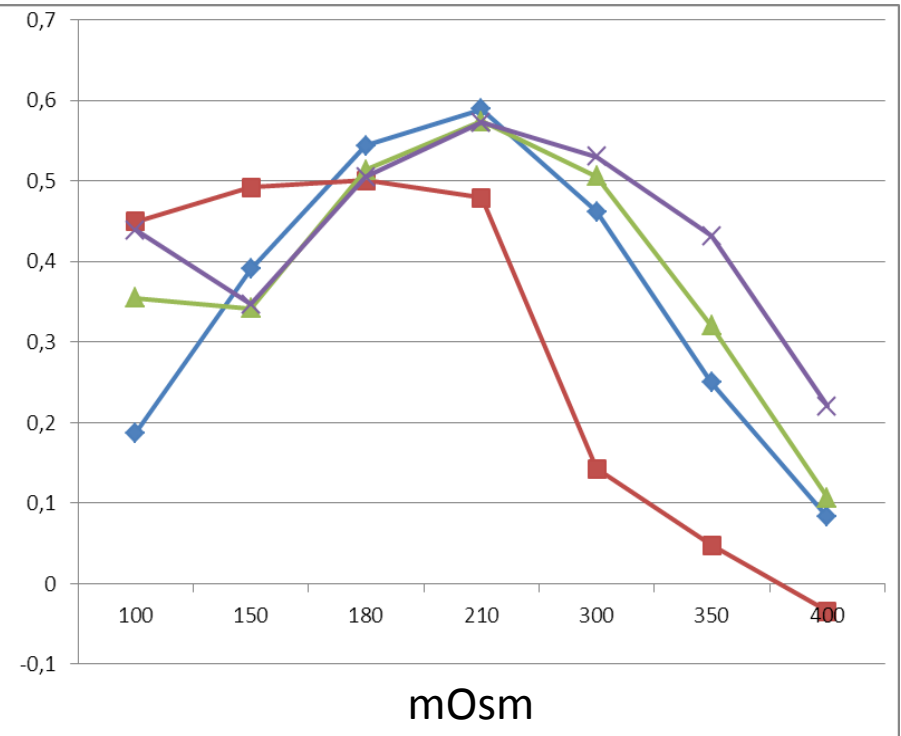

Control subject  
Proband (II:1)  
Unaffected Father I:2  
Unaffected Mother 1:1
